# Supplementary material
Source: publisher figshare collection journal article supplement (https://acs.figshare.com/ndownloader/files/3889777)
Supplement: Supplementary file 1 [file 3889777]

data_General
_audit_creation_date                    2014-05-09
_audit_creation_method                 'by CrystalStructure 4.0'
_audit_update_record                    ?

#==============================================================================
# PROCESSING SUMMARY (IUCr Office Use Only)

_journal_date_recd_electronic           ?
_journal_date_from_coeditor             ?
_journal_date_accepted                  ?
_journal_coeditor_code                  ?

#==============================================================================
# SUBMISSION DETAILS

_publ_contact_author_name             'Tadashi Mori'
_publ_contact_author_email            'tmori@chem.eng.osaka-u.ac.jp'
_publ_contact_author_fax              '+81-6-6879-7923'
_publ_contact_letter
;
    ENTER TEXT OF LETTER
;
_publ_requested_journal                'ENTER JOURNAL NAME HERE'
_publ_requested_category               'CHOOSE FI FM FO CI CM CO or AD'
_publ_requested_coeditor_name           ?

#==============================================================================
# TITLE AND AUTHOR LIST

_publ_section_title
;
    ENTER SECTION TITLE
;
_publ_section_title_footnote
;
    ENTER FOOTNOTE TO TITLE OF PAPER
;
loop_
_publ_author_name
_publ_author_footnote
_publ_author_address
' FIRST AUTHORS NAME '
;
  FIRST AUTHORS FOOTNOTES
;
;
  FIRST AUTHORS ADDRESS
;
_publ_section_synopsis
;
    ENTER SYNOPSIS
;

#==============================================================================
# TEXT

_publ_section_abstract
;
    ENTER ABSTRACT
;
_publ_section_comment
;
    ENTER TEXT
;
_publ_section_references
;
    ENTER OTHER REFERENCES

    Rigaku (2010). CrystalStructure. Version 4.0. 
    Rigaku Corporation, Tokyo, Japan.

    Altomare, A., Cascarano, G., Giacovazzo, C., Guagliardi, A., 
    Burla, M., Polidori, G., and Camalli, M. (1994) J. Appl. Cryst., 27, 435. 
    SIR92

    Sheldrick, G.M. (2008), Acta Cryst. A64, 112-122.

    Rigaku (1995). ABSCOR. 
    Rigaku Corporation, Tokyo, Japan.

;
_publ_section_figure_captions
;
    ENTER FIGURE CAPTIONS
;
_publ_section_exptl_prep
;
    ENTER COMPOUND PREPARATION DETAILS
;
_publ_section_exptl_refinement
;
    ENTER SPECIAL DETAILS OF THE REFINEMENT
;

#==============================================================================
data_n3_ether

#==============================================================================
# CHEMICAL DATA

_chemical_formula_sum                  'C18 H16 N2'
_chemical_formula_moiety               'C18 H16 N2'
_chemical_formula_weight                260.34
_chemical_melting_point                 ?

#==============================================================================
# CRYSTAL DATA
_symmetry_cell_setting                  monoclinic
_symmetry_space_group_name_H-M         'C 1 2/c 1'
_symmetry_space_group_name_Hall        '-C 2yc'
_symmetry_Int_Tables_number             15
loop_
_symmetry_equiv_pos_site_id
_symmetry_equiv_pos_as_xyz
1   '+X,+Y,+Z'
2   '-X,+Y,1/2-Z'
3   '-X,-Y,-Z'
4   '+X,-Y,1/2+Z'
5   '1/2+X,1/2+Y,+Z'
6   '1/2-X,1/2+Y,1/2-Z'
7   '1/2-X,1/2-Y,-Z'
8   '1/2+X,1/2-Y,1/2+Z'
#------------------------------------------------------------------------------
_cell_length_a                          13.4390(3)
_cell_length_b                          7.57747(14)
_cell_length_c                          28.7493(6)
_cell_angle_alpha                       90.0000
_cell_angle_beta                        97.2127(11)
_cell_angle_gamma                       90.0000
_cell_volume                            2904.49(10)
_cell_formula_units_Z                   8
_cell_measurement_reflns_used           17908
_cell_measurement_theta_min             3.10
_cell_measurement_theta_max             68.22
_cell_measurement_temperature           213
#------------------------------------------------------------------------------
_exptl_crystal_description              prism
_exptl_crystal_colour                   colorless
_exptl_crystal_size_max                 0.500
_exptl_crystal_size_mid                 0.500
_exptl_crystal_size_min                 0.300
_exptl_crystal_density_diffrn           1.191
_exptl_crystal_density_meas             ?
_exptl_crystal_density_method          'not measured'
_exptl_crystal_F_000                    1104.00
_exptl_absorpt_coefficient_mu           0.544
_exptl_absorpt_correction_type          multi-scan
_exptl_absorpt_process_details         'ABSCOR (Rigaku, 1995)'
_exptl_absorpt_correction_T_min         0.677
_exptl_absorpt_correction_T_max         0.849

#==============================================================================
# EXPERIMENTAL DATA

_diffrn_ambient_temperature             213
_diffrn_radiation_type                 'Cu K\a'
_diffrn_radiation_wavelength            1.54187
_diffrn_measurement_device_type        'Rigaku R-AXIS RAPID'
_diffrn_measurement_method              \w
_diffrn_detector_area_resol_mean        10.000
_diffrn_reflns_number                   18711
_diffrn_reflns_av_R_equivalents         0.0427
_diffrn_reflns_theta_max                68.21
_diffrn_reflns_theta_full               68.22
_diffrn_measured_fraction_theta_max     0.997
_diffrn_measured_fraction_theta_full    0.997
_diffrn_reflns_limit_h_min             -16
_diffrn_reflns_limit_h_max              16
_diffrn_reflns_limit_k_min             -9
_diffrn_reflns_limit_k_max              9
_diffrn_reflns_limit_l_min             -34
_diffrn_reflns_limit_l_max              33
_diffrn_standards_number                0
_diffrn_standards_interval_count        .
_diffrn_standards_decay_%               ?

#==============================================================================
# REFINEMENT DATA

_refine_special_details
;
    Refinement was performed using all reflections. The weighted 
    R-factor (wR) and goodness of fit (S) are based on F^2^.
    R-factor (gt) are based on F. The threshold expression of
    F^2^ > 2.0 sigma(F^2^) is used only for calculating R-factor (gt).
;
_reflns_number_total                    2650
_reflns_number_gt                       1958
_reflns_threshold_expression            F^2^>2.0\s(F^2^)
_refine_ls_structure_factor_coef        Fsqd
_refine_ls_R_factor_gt                  0.0529
_refine_ls_wR_factor_ref                0.1461
_refine_ls_number_restraints            0
_refine_ls_hydrogen_treatment           refxyz
_refine_ls_number_reflns                2650
_refine_ls_number_parameters            245
_refine_ls_goodness_of_fit_ref          1.023
_refine_ls_weighting_scheme             calc
_refine_ls_weighting_details
           'w = 1/[\s^2^(Fo^2^)+(0.0956P)^2^+0.0000P] where P=(Fo^2^+2Fc^2^)/3'
_atom_sites_solution_hydrogens          geom
_atom_sites_solution_primary            direct
_atom_sites_solution_secondary          difmap
_refine_ls_shift/su_max                 0.001
_refine_diff_density_max                0.150
_refine_diff_density_min               -0.240
_refine_ls_extinction_method            none
_refine_ls_extinction_coef              ?

loop_
_atom_type_symbol
_atom_type_description
_atom_type_scat_dispersion_real
_atom_type_scat_dispersion_imag
_atom_type_scat_source
  'C' 'C'  0.0181 0.0091 
;
International Tables for Crystallography
(1992, Vol. C, Tables 4.2.6.8 and 6.1.1.4)
;
  'H' 'H'  0.0000 0.0000 
;
International Tables for Crystallography
(1992, Vol. C, Table 6.1.1.4)
;
  'N' 'N'  0.0311 0.0180 
;
International Tables for Crystallography
(1992, Vol. C, Tables 4.2.6.8 and 6.1.1.4)
;

#==============================================================================
# ATOMIC COORDINATES AND THERMAL PARAMETERS

loop_
_atom_site_label
_atom_site_type_symbol
_atom_site_fract_x
_atom_site_fract_y
_atom_site_fract_z
_atom_site_U_iso_or_equiv
_atom_site_adp_type
_atom_site_occupancy
_atom_site_symmetry_multiplicity
_atom_site_calc_flag
_atom_site_refinement_flags
_atom_site_disorder_assembly
_atom_site_disorder_group
 N1 N 0.86743(13) 0.3753(3) 0.00909(6) 0.0817(6) Uani 1.0 8 d . . .
 N2 N 0.59504(13) 0.6119(3) -0.05998(6) 0.0812(6) Uani 1.0 8 d . . .
 C1 C 0.64499(13) 0.11294(19) 0.14123(5) 0.0525(5) Uani 1.0 8 d . . .
 C2 C 0.54605(15) 0.0868(3) 0.14431(6) 0.0608(5) Uani 1.0 8 d . . .
 C3 C 0.51215(15) -0.0429(3) 0.17341(7) 0.0651(5) Uani 1.0 8 d . . .
 C4 C 0.58003(14) -0.1485(3) 0.20012(6) 0.0596(5) Uani 1.0 8 d . . .
 C5 C 0.68448(12) -0.12543(19) 0.19853(5) 0.0484(4) Uani 1.0 8 d . . .
 C6 C 0.75505(15) -0.2307(3) 0.22618(6) 0.0597(5) Uani 1.0 8 d . . .
 C7 C 0.85486(16) -0.2081(3) 0.22548(6) 0.0670(5) Uani 1.0 8 d . . .
 C8 C 0.88960(15) -0.0802(3) 0.19627(6) 0.0629(5) Uani 1.0 8 d . . .
 C9 C 0.82393(14) 0.0247(2) 0.16861(6) 0.0555(5) Uani 1.0 8 d . . .
 C10 C 0.71741(12) 0.00682(18) 0.16875(5) 0.0462(4) Uani 1.0 8 d . . .
 C11 C 0.67743(16) 0.2556(2) 0.10925(6) 0.0580(5) Uani 1.0 8 d . . .
 C12 C 0.70237(15) 0.4296(2) 0.13506(6) 0.0560(5) Uani 1.0 8 d . . .
 C13 C 0.75035(14) 0.5650(2) 0.10459(5) 0.0542(5) Uani 1.0 8 d . . .
 C14 C 0.68323(12) 0.60688(17) 0.06020(5) 0.0495(4) Uani 1.0 8 d . . .
 C15 C 0.70626(12) 0.55016(19) 0.01826(5) 0.0509(4) Uani 1.0 8 d . . .
 C16 C 0.59124(17) 0.7103(3) 0.06425(8) 0.0681(6) Uani 1.0 8 d . . .
 C17 C 0.79630(14) 0.4532(3) 0.01363(6) 0.0587(5) Uani 1.0 8 d . . .
 C18 C 0.64366(14) 0.5845(2) -0.02505(6) 0.0598(5) Uani 1.0 8 d . . .
 H1 H 0.4979(14) 0.158(3) 0.1247(7) 0.080(6) Uiso 1.0 8 d . . .
 H2 H 0.4409(18) -0.070(3) 0.1781(7) 0.102(7) Uiso 1.0 8 d . . .
 H3 H 0.5624(13) -0.239(3) 0.2215(7) 0.068(5) Uiso 1.0 8 d . . .
 H4 H 0.7251(13) -0.325(3) 0.2467(7) 0.077(6) Uiso 1.0 8 d . . .
 H5 H 0.9044(14) -0.290(3) 0.2460(7) 0.082(6) Uiso 1.0 8 d . . .
 H6 H 0.9618(17) -0.057(3) 0.1947(7) 0.096(7) Uiso 1.0 8 d . . .
 H7 H 0.8459(13) 0.112(3) 0.1486(6) 0.067(6) Uiso 1.0 8 d . . .
 H8 H 0.7516(14) 0.219(3) 0.0996(6) 0.071(5) Uiso 1.0 8 d . . .
 H9 H 0.6212(13) 0.277(3) 0.0843(6) 0.063(5) Uiso 1.0 8 d . . .
 H10 H 0.7529(14) 0.410(3) 0.1649(7) 0.073(6) Uiso 1.0 8 d . . .
 H11 H 0.6380(13) 0.487(3) 0.1470(6) 0.071(5) Uiso 1.0 8 d . . .
 H12 H 0.8149(13) 0.514(3) 0.0979(6) 0.055(5) Uiso 1.0 8 d . . .
 H13 H 0.7645(12) 0.681(3) 0.1231(6) 0.061(5) Uiso 1.0 8 d . . .
 H14 H 0.6107(18) 0.825(4) 0.0770(8) 0.116(9) Uiso 1.0 8 d . . .
 H15 H 0.5536(17) 0.741(3) 0.0332(8) 0.095(7) Uiso 1.0 8 d . . .
 H16 H 0.5539(18) 0.652(4) 0.0825(9) 0.111(9) Uiso 1.0 8 d . . .


loop_
_atom_site_aniso_label
_atom_site_aniso_U_11
_atom_site_aniso_U_22
_atom_site_aniso_U_33
_atom_site_aniso_U_12
_atom_site_aniso_U_13
_atom_site_aniso_U_23
 N1 0.0810(12) 0.0838(12) 0.0792(12) 0.0113(10) 0.0055(9) -0.0122(9)
 N2 0.0984(13) 0.0802(12) 0.0584(10) -0.0071(9) -0.0168(9) 0.0102(8)
 C1 0.0723(11) 0.0416(8) 0.0414(9) 0.0003(8) -0.0014(8) -0.0029(6)
 C2 0.0683(12) 0.0514(10) 0.0587(11) 0.0044(9) -0.0071(9) -0.0001(8)
 C3 0.0617(11) 0.0621(11) 0.0714(12) -0.0033(9) 0.0073(9) -0.0062(9)
 C4 0.0733(12) 0.0500(10) 0.0568(11) -0.0081(9) 0.0127(9) 0.0015(8)
 C5 0.0656(10) 0.0407(8) 0.0381(8) -0.0000(7) 0.0031(7) -0.0010(6)
 C6 0.0796(13) 0.0501(10) 0.0466(9) 0.0034(9) -0.0027(9) 0.0027(7)
 C7 0.0781(14) 0.0582(11) 0.0605(11) 0.0081(10) -0.0077(10) -0.0008(9)
 C8 0.0594(11) 0.0605(11) 0.0661(12) 0.0047(9) -0.0029(9) -0.0085(9)
 C9 0.0726(12) 0.0450(9) 0.0491(10) -0.0056(8) 0.0090(8) -0.0052(7)
 C10 0.0622(10) 0.0384(8) 0.0369(8) -0.0010(7) 0.0024(7) -0.0041(6)
 C11 0.0817(13) 0.0442(9) 0.0449(9) -0.0016(8) -0.0043(9) 0.0031(7)
 C12 0.0773(12) 0.0450(9) 0.0442(10) -0.0044(8) 0.0013(9) -0.0008(7)
 C13 0.0710(12) 0.0449(9) 0.0443(9) -0.0031(8) -0.0025(8) 0.0003(7)
 C14 0.0607(10) 0.0350(8) 0.0511(9) -0.0065(7) 0.0006(8) 0.0028(6)
 C15 0.0617(10) 0.0407(8) 0.0479(9) -0.0049(7) -0.0030(7) 0.0040(7)
 C16 0.0742(13) 0.0579(12) 0.0711(13) 0.0088(10) 0.0054(11) 0.0010(10)
 C17 0.0727(12) 0.0531(10) 0.0492(10) -0.0038(9) 0.0030(9) -0.0019(8)
 C18 0.0748(12) 0.0507(9) 0.0510(10) -0.0071(8) -0.0034(9) 0.0041(8)

#==============================================================================
_computing_data_collection             'RAPID AUTO (Rigaku, ????)'
_computing_cell_refinement             'RAPID AUTO'
_computing_data_reduction              'RAPID AUTO'
_computing_structure_solution          'SIR92 (Altomare, et al., 1994)'
_computing_structure_refinement        'SHELXL97 (Sheldrick, 2008)'
_computing_publication_material        'CrystalStructure 4.0 (Rigaku, 2010)'
_computing_molecular_graphics          'CrystalStructure 4.0'

#==============================================================================
# MOLECULAR GEOMETRY

_geom_special_details
;
    ENTER SPECIAL DETAILS OF THE MOLECULAR GEOMETRY
;

loop_
_geom_bond_atom_site_label_1
_geom_bond_atom_site_label_2
_geom_bond_distance
_geom_bond_publ_flag
_geom_bond_site_symmetry_1
_geom_bond_site_symmetry_2
N1 C17 1.144(3) yes . .
N2 C18 1.146(3) yes . .
C1 C2 1.358(3) yes . .
C1 C10 1.424(2) yes . .
C1 C11 1.518(3) yes . .
C2 C3 1.403(3) yes . .
C3 C4 1.373(3) yes . .
C4 C5 1.421(3) yes . .
C5 C6 1.407(3) yes . .
C5 C10 1.424(2) yes . .
C6 C7 1.355(3) yes . .
C7 C8 1.400(3) yes . .
C8 C9 1.366(3) yes . .
C9 C10 1.438(3) yes . .
C11 C12 1.529(3) yes . .
C12 C13 1.542(3) yes . .
C13 C14 1.501(2) yes . .
C14 C15 1.352(3) yes . .
C14 C16 1.481(3) yes . .
C15 C17 1.436(3) yes . .
C15 C18 1.436(3) yes . .
C2 H1 0.970(19) no . .
C3 H2 1.00(3) no . .
C4 H3 0.971(18) no . .
C6 H4 1.04(2) no . .
C7 H5 1.036(19) no . .
C8 H6 0.99(3) no . .
C9 H7 0.949(18) no . .
C11 H8 1.104(19) no . .
C11 H9 0.989(17) no . .
C12 H10 1.035(17) no . .
C12 H11 1.062(18) no . .
C13 H12 0.990(17) no . .
C13 H13 1.032(18) no . .
C16 H14 0.97(3) no . .
C16 H15 1.00(3) no . .
C16 H16 0.89(3) no . .

loop_
_geom_angle_atom_site_label_1
_geom_angle_atom_site_label_2
_geom_angle_atom_site_label_3
_geom_angle
_geom_angle_publ_flag
_geom_angle_site_symmetry_1
_geom_angle_site_symmetry_2
_geom_angle_site_symmetry_3
C2 C1 C10 119.22(15) yes . . .
C2 C1 C11 120.07(15) yes . . .
C10 C1 C11 120.70(16) yes . . .
C1 C2 C3 122.32(17) yes . . .
C2 C3 C4 119.93(19) yes . . .
C3 C4 C5 119.98(17) yes . . .
C4 C5 C6 120.71(15) yes . . .
C4 C5 C10 119.26(14) yes . . .
C6 C5 C10 120.03(16) yes . . .
C5 C6 C7 121.23(17) yes . . .
C6 C7 C8 120.11(18) yes . . .
C7 C8 C9 120.79(19) yes . . .
C8 C9 C10 120.94(16) yes . . .
C1 C10 C5 119.29(15) yes . . .
C1 C10 C9 123.82(14) yes . . .
C5 C10 C9 116.89(14) yes . . .
C1 C11 C12 112.47(14) yes . . .
C11 C12 C13 112.33(15) yes . . .
C12 C13 C14 111.96(15) yes . . .
C13 C14 C15 120.70(15) yes . . .
C13 C14 C16 117.61(15) yes . . .
C15 C14 C16 121.69(15) yes . . .
C14 C15 C17 122.36(14) yes . . .
C14 C15 C18 122.74(15) yes . . .
C17 C15 C18 114.90(15) yes . . .
N1 C17 C15 178.74(18) yes . . .
N2 C18 C15 178.9(2) yes . . .
C1 C2 H1 117.9(12) no . . .
C3 C2 H1 119.7(12) no . . .
C2 C3 H2 127.4(12) no . . .
C4 C3 H2 112.7(12) no . . .
C3 C4 H3 124.6(10) no . . .
C5 C4 H3 115.4(10) no . . .
C5 C6 H4 115.4(10) no . . .
C7 C6 H4 123.3(10) no . . .
C6 C7 H5 118.9(11) no . . .
C8 C7 H5 121.0(11) no . . .
C7 C8 H6 123.6(12) no . . .
C9 C8 H6 115.6(12) no . . .
C8 C9 H7 122.1(10) no . . .
C10 C9 H7 116.9(10) no . . .
C1 C11 H8 108.1(9) no . . .
C1 C11 H9 107.8(11) no . . .
C12 C11 H8 100.9(9) no . . .
C12 C11 H9 108.2(10) no . . .
H8 C11 H9 119.4(14) no . . .
C11 C12 H10 110.9(10) no . . .
C11 C12 H11 111.7(10) no . . .
C13 C12 H10 106.9(10) no . . .
C13 C12 H11 109.2(10) no . . .
H10 C12 H11 105.6(14) no . . .
C12 C13 H12 106.9(10) no . . .
C12 C13 H13 109.6(10) no . . .
C14 C13 H12 111.4(9) no . . .
C14 C13 H13 108.2(9) no . . .
H12 C13 H13 108.8(13) no . . .
C14 C16 H14 108.4(15) no . . .
C14 C16 H15 112.8(14) no . . .
C14 C16 H16 108.7(16) no . . .
H14 C16 H15 102.5(19) no . . .
H14 C16 H16 112(3) no . . .
H15 C16 H16 113(2) no . . .

loop_
_geom_torsion_atom_site_label_1
_geom_torsion_atom_site_label_2
_geom_torsion_atom_site_label_3
_geom_torsion_atom_site_label_4
_geom_torsion
_geom_torsion_publ_flag
_geom_torsion_site_symmetry_1
_geom_torsion_site_symmetry_2
_geom_torsion_site_symmetry_3
_geom_torsion_site_symmetry_4
C2 C1 C10 C5 0.6(2) no . . . .
C2 C1 C10 C9 -179.25(13) no . . . .
C10 C1 C2 C3 -0.7(3) no . . . .
C2 C1 C11 C12 94.24(18) no . . . .
C11 C1 C2 C3 -179.84(13) no . . . .
C10 C1 C11 C12 -84.89(18) no . . . .
C11 C1 C10 C5 179.76(12) no . . . .
C11 C1 C10 C9 -0.1(2) no . . . .
C1 C2 C3 C4 0.2(3) no . . . .
C2 C3 C4 C5 0.5(3) no . . . .
C3 C4 C5 C6 179.05(15) no . . . .
C3 C4 C5 C10 -0.5(3) no . . . .
C4 C5 C6 C7 -179.00(14) no . . . .
C4 C5 C10 C1 -0.0(2) no . . . .
C4 C5 C10 C9 179.86(13) no . . . .
C6 C5 C10 C1 -179.60(13) no . . . .
C6 C5 C10 C9 0.3(2) no . . . .
C10 C5 C6 C7 0.6(3) no . . . .
C5 C6 C7 C8 -1.1(3) no . . . .
C6 C7 C8 C9 0.8(3) no . . . .
C7 C8 C9 C10 0.1(3) no . . . .
C8 C9 C10 C1 179.27(14) no . . . .
C8 C9 C10 C5 -0.6(3) no . . . .
C1 C11 C12 C13 171.34(14) no . . . .
C11 C12 C13 C14 58.82(19) no . . . .
C12 C13 C14 C15 -109.25(16) no . . . .
C12 C13 C14 C16 70.20(16) no . . . .
C13 C14 C15 C17 -2.0(3) no . . . .
C13 C14 C15 C18 179.01(12) no . . . .
C16 C14 C15 C17 178.56(14) no . . . .
C16 C14 C15 C18 -0.4(3) no . . . .

loop_
_geom_contact_atom_site_label_1
_geom_contact_atom_site_label_2
_geom_contact_distance
_geom_contact_publ_flag
_geom_contact_site_symmetry_1
_geom_contact_site_symmetry_2
N1 C14 3.504(3) no . .
N1 C18 3.432(3) no . .
N2 C14 3.509(3) no . .
N2 C17 3.436(3) no . .
C1 C4 2.815(3) no . .
C2 C5 2.784(3) no . .
C2 C12 3.372(3) no . .
C3 C10 2.804(3) no . .
C5 C8 2.787(3) no . .
C6 C9 2.779(3) no . .
C7 C10 2.823(3) no . .
C9 C11 3.001(3) no . .
C9 C12 3.552(3) no . .
C10 C12 3.345(2) no . .
C11 C14 3.018(2) no . .
C11 C15 3.497(3) no . .
C12 C15 3.487(3) no . .
C12 C16 3.184(3) no . .
C13 C17 2.889(3) no . .
C16 C18 2.907(3) no . .
N1 C11 3.522(3) no . 7_655
N1 C15 3.435(3) no . 7_655
N1 C16 3.454(3) no . 5_545
N1 C17 3.332(3) no . 7_655
N1 C18 3.520(3) no . 7_655
N2 C9 3.587(3) no . 7_655
N2 C13 3.553(3) no . 7_665
N2 C16 3.488(3) no . 3_665
C6 C10 3.597(3) no . 6_645
C9 N2 3.587(3) no . 7_655
C10 C6 3.597(3) no . 6_655
C11 N1 3.522(3) no . 7_655
C13 N2 3.553(3) no . 7_665
C14 C18 3.534(3) no . 7_665
C15 N1 3.435(3) no . 7_655
C15 C15 3.459(2) no . 7_665
C15 C18 3.416(3) no . 7_665
C16 N1 3.454(3) no . 5_455
C16 N2 3.488(3) no . 3_665
C17 N1 3.332(3) no . 7_655
C17 C17 3.376(3) no . 7_655
C18 N1 3.520(3) no . 7_655
C18 C14 3.534(3) no . 7_665
C18 C15 3.416(3) no . 7_665
N1 H8 3.408(18) no . .
N1 H12 2.929(16) no . .
N2 H15 2.97(3) no . .
C1 H2 3.36(3) no . .
C1 H7 2.682(17) no . .
C1 H10 2.714(17) no . .
C1 H11 2.838(19) no . .
C2 H3 3.310(18) no . .
C2 H8 3.344(19) no . .
C2 H9 2.552(18) no . .
C2 H11 3.268(19) no . .
C4 H1 3.28(2) no . .
C4 H4 2.594(18) no . .
C5 H2 3.28(3) no . .
C5 H5 3.336(19) no . .
C5 H7 3.285(18) no . .
C6 H3 2.577(17) no . .
C6 H6 3.30(3) no . .
C7 H7 3.275(18) no . .
C8 H4 3.35(2) no . .
C9 H5 3.34(2) no . .
C9 H8 2.562(17) no . .
C9 H10 3.066(17) no . .
C10 H1 3.270(19) no . .
C10 H3 3.303(18) no . .
C10 H4 3.36(2) no . .
C10 H6 3.31(3) no . .
C10 H8 2.641(18) no . .
C10 H9 3.313(17) no . .
C10 H10 3.093(17) no . .
C11 H1 2.61(2) no . .
C11 H7 2.635(17) no . .
C11 H12 2.741(17) no . .
C11 H13 3.434(18) no . .
C11 H16 3.47(3) no . .
C12 H1 3.41(2) no . .
C12 H7 3.076(18) no . .
C12 H14 3.57(3) no . .
C12 H16 2.89(3) no . .
C13 H8 2.627(18) no . .
C13 H9 2.805(17) no . .
C13 H14 2.77(3) no . .
C13 H15 3.41(2) no . .
C13 H16 2.72(3) no . .
C14 H8 3.242(18) no . .
C14 H9 2.751(17) no . .
C14 H10 3.385(18) no . .
C14 H11 2.795(18) no . .
C15 H8 3.432(17) no . .
C15 H9 3.120(18) no . .
C15 H12 2.571(15) no . .
C15 H13 3.176(16) no . .
C15 H14 3.06(3) no . .
C15 H15 2.59(3) no . .
C15 H16 3.03(3) no . .
C16 H9 3.349(17) no . .
C16 H11 2.925(18) no . .
C16 H12 3.384(16) no . .
C16 H13 2.711(15) no . .
C17 H8 3.161(18) no . .
C17 H9 3.556(18) no . .
C17 H12 2.448(15) no . .
C18 H14 3.53(3) no . .
C18 H15 2.49(3) no . .
C18 H16 3.50(3) no . .
H1 H2 2.49(3) no . .
H1 H9 2.32(3) no . .
H1 H11 3.14(3) no . .
H2 H3 2.32(3) no . .
H3 H4 2.31(3) no . .
H4 H5 2.43(3) no . .
H5 H6 2.48(3) no . .
H6 H7 2.30(3) no . .
H7 H8 1.95(3) no . .
H7 H9 3.56(3) no . .
H7 H10 2.65(3) no . .
H7 H12 3.38(3) no . .
H8 H10 2.37(3) no . .
H8 H11 2.97(3) no . .
H8 H12 2.40(3) no . .
H8 H13 3.56(3) no . .
H9 H10 2.91(3) no . .
H9 H11 2.39(3) no . .
H9 H12 3.15(3) no . .
H9 H16 2.98(3) no . .
H10 H12 2.33(3) no . .
H10 H13 2.40(3) no . .
H11 H12 2.92(3) no . .
H11 H13 2.41(3) no . .
H11 H14 3.25(4) no . .
H11 H16 2.40(3) no . .
H13 H14 2.56(3) no . .
H13 H16 2.93(3) no . .
N1 H8 3.403(16) no . 7_655
N1 H9 2.943(18) no . 7_655
N1 H14 3.40(3) no . 7_665
N1 H15 2.71(3) no . 5_545
N1 H15 3.38(3) no . 7_665
N1 H16 3.50(3) no . 5_545
N2 H1 2.73(2) no . 3_665
N2 H7 3.243(18) no . 7_655
N2 H8 3.523(18) no . 7_655
N2 H9 3.021(17) no . 3_665
N2 H12 3.319(17) no . 7_665
N2 H13 3.191(17) no . 7_665
N2 H15 3.48(3) no . 3_665
N2 H16 2.85(3) no . 3_665
C1 H4 3.497(18) no . 6_655
C1 H5 3.47(2) no . 6_655
C1 H14 2.86(3) no . 1_545
C2 H5 3.28(2) no . 6_655
C2 H6 3.33(3) no . 5_455
C2 H12 3.270(16) no . 5_445
C2 H14 2.98(3) no . 1_545
C3 H5 3.30(2) no . 5_455
C3 H5 3.11(2) no . 6_655
C3 H7 3.453(17) no . 5_445
C3 H10 3.481(18) no . 5_445
C3 H12 3.237(15) no . 5_445
C3 H14 3.37(3) no . 1_545
C3 H16 3.59(3) no . 1_545
C4 H2 3.60(2) no . 2_655
C4 H3 3.209(19) no . 2_655
C4 H5 3.12(2) no . 6_655
C4 H6 3.47(3) no . 5_445
C4 H11 3.299(19) no . 1_545
C5 H4 2.94(2) no . 6_655
C5 H5 3.31(2) no . 6_655
C5 H11 3.316(18) no . 1_545
C5 H13 2.932(17) no . 1_545
C5 H14 3.53(3) no . 1_545
C6 H4 3.18(2) no . 6_655
C6 H10 3.244(18) no . 1_545
C6 H10 3.322(19) no . 6_645
C6 H11 3.369(17) no . 1_545
C6 H13 3.056(16) no . 1_545
C7 H2 3.33(3) no . 5_545
C7 H4 3.23(2) no . 6_655
C7 H5 3.295(19) no . 2_755
C7 H6 3.35(2) no . 2_755
C7 H10 3.565(17) no . 1_545
C7 H13 3.154(16) no . 1_545
C8 H1 3.32(2) no . 5_545
C8 H3 3.488(17) no . 5_555
C8 H3 3.506(18) no . 6_655
C8 H4 3.07(2) no . 6_655
C8 H5 3.433(19) no . 2_755
C8 H6 3.50(2) no . 2_755
C8 H13 3.105(16) no . 1_545
C9 H2 3.45(3) no . 5_555
C9 H4 2.84(2) no . 6_655
C9 H13 2.979(18) no . 1_545
C10 H4 2.767(19) no . 6_655
C10 H5 3.48(2) no . 6_655
C10 H13 2.904(18) no . 1_545
C10 H14 3.16(3) no . 1_545
C11 H14 3.48(3) no . 1_545
C12 H2 3.29(3) no . 5_555
C13 H1 3.379(19) no . 5_555
C13 H2 3.27(3) no . 5_555
C17 H8 3.490(17) no . 7_655
C17 H14 3.46(3) no . 7_665
C17 H15 3.46(3) no . 7_665
C18 H8 3.552(18) no . 7_655
C18 H16 3.45(3) no . 3_665
H1 N2 2.73(2) no . 3_665
H1 C8 3.32(2) no . 5_455
H1 C13 3.379(19) no . 5_445
H1 H6 3.03(3) no . 5_455
H1 H12 2.71(3) no . 5_445
H1 H13 3.14(3) no . 5_445
H1 H14 3.33(4) no . 1_545
H2 C4 3.60(2) no . 2_655
H2 C7 3.33(3) no . 5_455
H2 C9 3.45(3) no . 5_445
H2 C12 3.29(3) no . 5_445
H2 C13 3.27(3) no . 5_445
H2 H3 3.17(3) no . 2_655
H2 H5 2.97(3) no . 5_455
H2 H5 3.53(3) no . 6_655
H2 H7 2.81(3) no . 5_445
H2 H8 3.56(3) no . 5_445
H2 H10 2.51(3) no . 5_445
H2 H12 2.76(3) no . 5_445
H2 H13 3.28(3) no . 5_445
H3 C4 3.209(19) no . 2_655
H3 C8 3.488(17) no . 5_445
H3 C8 3.506(18) no . 6_645
H3 H2 3.17(3) no . 2_655
H3 H3 2.49(3) no . 2_655
H3 H5 3.55(3) no . 6_655
H3 H6 2.82(3) no . 5_445
H3 H6 3.45(3) no . 6_645
H3 H7 3.55(3) no . 5_445
H3 H11 3.24(3) no . 1_545
H4 C1 3.497(18) no . 6_645
H4 C5 2.94(2) no . 6_645
H4 C6 3.18(2) no . 6_645
H4 C7 3.23(2) no . 6_645
H4 C8 3.07(2) no . 6_645
H4 C9 2.84(2) no . 6_645
H4 C10 2.767(19) no . 6_645
H4 H7 3.30(3) no . 6_645
H4 H10 3.15(3) no . 1_545
H4 H10 3.08(3) no . 6_645
H4 H11 3.29(3) no . 1_545
H5 C1 3.47(2) no . 6_645
H5 C2 3.28(2) no . 6_645
H5 C3 3.30(2) no . 5_545
H5 C3 3.11(2) no . 6_645
H5 C4 3.12(2) no . 6_645
H5 C5 3.31(2) no . 6_645
H5 C7 3.295(19) no . 2_755
H5 C8 3.433(19) no . 2_755
H5 C10 3.48(2) no . 6_645
H5 H2 2.97(3) no . 5_545
H5 H2 3.53(3) no . 6_645
H5 H3 3.55(3) no . 6_645
H5 H5 2.55(3) no . 2_755
H5 H6 2.91(3) no . 2_755
H6 C2 3.33(3) no . 5_545
H6 C4 3.47(3) no . 5_555
H6 C7 3.35(2) no . 2_755
H6 C8 3.50(2) no . 2_755
H6 H1 3.03(3) no . 5_545
H6 H3 2.82(3) no . 5_555
H6 H3 3.45(3) no . 6_655
H6 H5 2.91(3) no . 2_755
H6 H6 3.22(3) no . 2_755
H6 H11 2.90(3) no . 5_545
H7 N2 3.243(18) no . 7_655
H7 C3 3.453(17) no . 5_555
H7 H2 2.81(3) no . 5_555
H7 H3 3.55(3) no . 5_555
H7 H4 3.30(3) no . 6_655
H7 H13 3.50(3) no . 1_545
H7 H16 3.58(4) no . 5_545
H8 N1 3.403(16) no . 7_655
H8 N2 3.523(18) no . 7_655
H8 C17 3.490(17) no . 7_655
H8 C18 3.552(18) no . 7_655
H8 H2 3.56(3) no . 5_555
H8 H14 3.55(4) no . 1_545
H9 N1 2.943(18) no . 7_655
H9 N2 3.021(17) no . 3_665
H9 H14 3.43(4) no . 1_545
H10 C3 3.481(18) no . 5_555
H10 C6 3.244(18) no . 1_565
H10 C6 3.322(19) no . 6_655
H10 C7 3.565(17) no . 1_565
H10 H2 2.51(3) no . 5_555
H10 H4 3.15(3) no . 1_565
H10 H4 3.08(3) no . 6_655
H11 C4 3.299(19) no . 1_565
H11 C5 3.316(18) no . 1_565
H11 C6 3.369(17) no . 1_565
H11 H3 3.24(3) no . 1_565
H11 H4 3.29(3) no . 1_565
H11 H6 2.90(3) no . 5_455
H12 N2 3.319(17) no . 7_665
H12 C2 3.270(16) no . 5_555
H12 C3 3.237(15) no . 5_555
H12 H1 2.71(3) no . 5_555
H12 H2 2.76(3) no . 5_555
H13 N2 3.191(17) no . 7_665
H13 C5 2.932(17) no . 1_565
H13 C6 3.056(16) no . 1_565
H13 C7 3.154(16) no . 1_565
H13 C8 3.105(16) no . 1_565
H13 C9 2.979(18) no . 1_565
H13 C10 2.904(18) no . 1_565
H13 H1 3.14(3) no . 5_555
H13 H2 3.28(3) no . 5_555
H13 H7 3.50(3) no . 1_565
H14 N1 3.40(3) no . 7_665
H14 C1 2.86(3) no . 1_565
H14 C2 2.98(3) no . 1_565
H14 C3 3.37(3) no . 1_565
H14 C5 3.53(3) no . 1_565
H14 C10 3.16(3) no . 1_565
H14 C11 3.48(3) no . 1_565
H14 C17 3.46(3) no . 7_665
H14 H1 3.33(4) no . 1_565
H14 H8 3.55(4) no . 1_565
H14 H9 3.43(4) no . 1_565
H15 N1 2.71(3) no . 5_455
H15 N1 3.38(3) no . 7_665
H15 N2 3.48(3) no . 3_665
H15 C17 3.46(3) no . 7_665
H16 N1 3.50(3) no . 5_455
H16 N2 2.85(3) no . 3_665
H16 C3 3.59(3) no . 1_565
H16 C18 3.45(3) no . 3_665
H16 H7 3.58(4) no . 5_455

#==============================================================================

#==============================================================================
# Additional structures and associated data_? identifiers
# should be added at this point if there is more than one 
# structure analysis in the CIF.

#==============================================================================
#     End of CIF
#==============================================================================
